# Supplementary material
Source: ML conference proceedings conference paper supplement (https://aclanthology.org/2026.semeval-1.184)
Supplement: SupplementaryMaterial [file diagram.pdf › latex/diagram.pdf]

### Phase 1: CoT Distillation from Deepseek

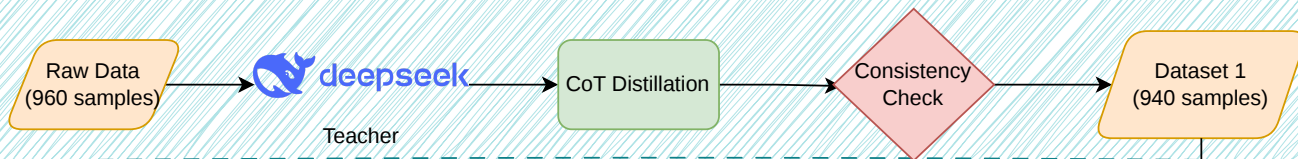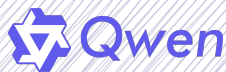

Different experiments

LoRA Fine Tuning

Task 1/3

### Phase 3: Formal Experiments

Dataset 2 (1260 Samples)

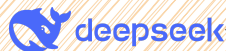

Generate Adversarial Samples

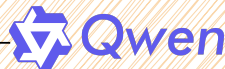

Errors on 14B

### Phase 2: Augmented Data Generation

Some mammals are dogs. No cats are dogs. Therefore, no cats are mammals.

Phase 1

Distillation Example

**Step 1:** Symbolize (M:mammals, P:dogs, S:cats).  
**Step 2:** Form: P1(Some M are P), P2(No S are P), C(No S are M).  
**Step 3:** Check distribution: M is distributed in C, but undistributed in P1.  
**Step 4:** Fallacy: Illicit Major.  
**Conclusion:** Invalid.
